# Supplementary material for: Identification of a novel DNMT1 mutation in a Chinese patient with hereditary sensory and autonomic neuropathy type IE
Source: Springer Nature journal article supplement (doi:10.1186/s12883-018-1177-2), 2018-10-20

19:10,265,585 19:10,265,590 19:10,265,595 19:10,265,600 19:10,265,605 19:10,265,610 19:10,265,615 19:10,265,620 19:10,265,625

DNMT1  
K N I L D E Y T S D S N S Q  
K N I L D E Y/N T S S D S N S Q

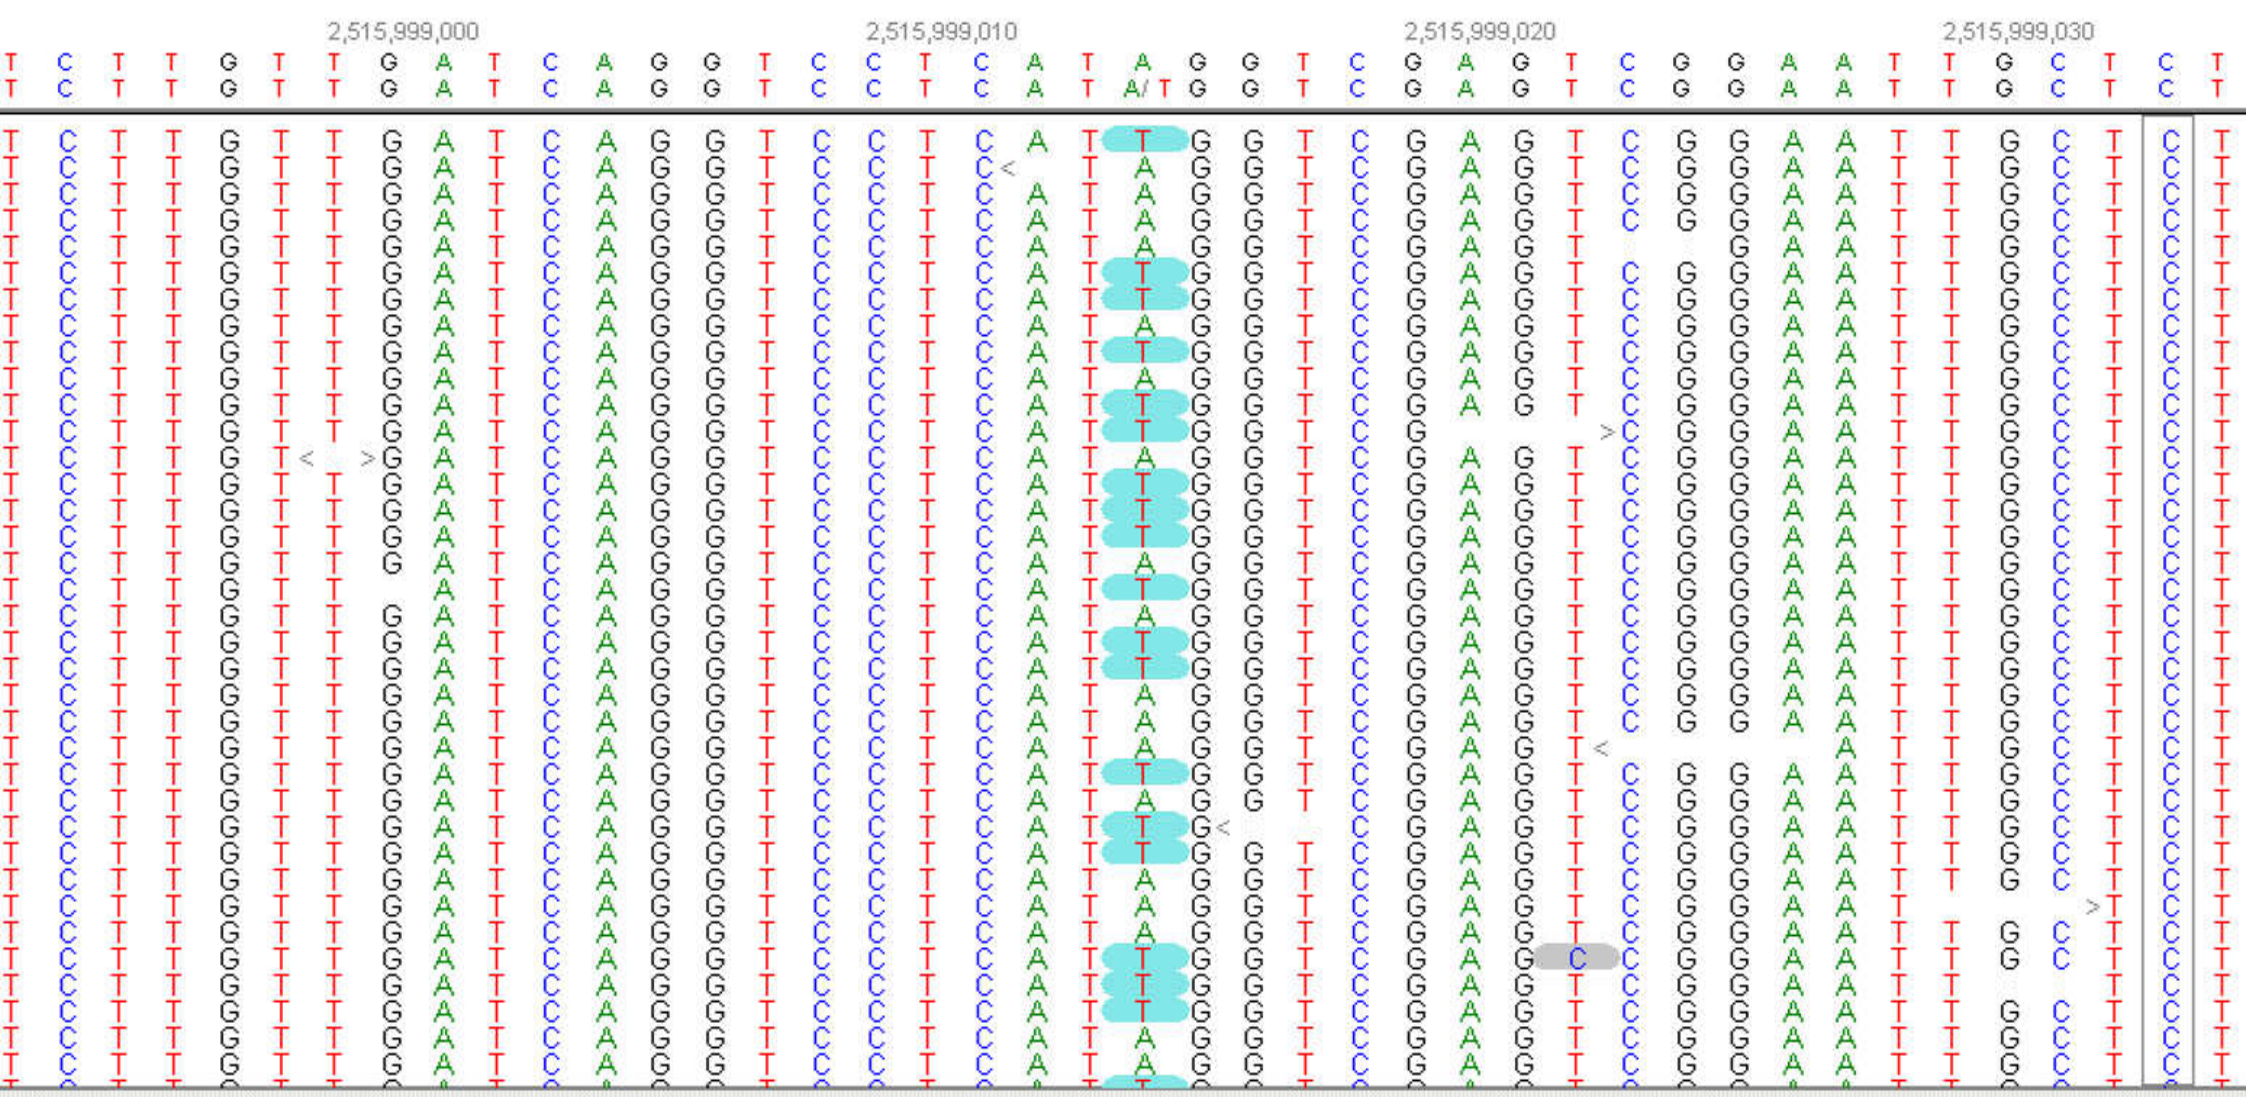

Supplement: MOESM1 [file 16214780]
